# Supplementary material for: Long-Term Morpholino Oligomers in Hexose Elicits Long-Lasting Therapeutic Improvements in mdx Mice
Source: PubMed Central journal article supplement — Mol Ther Nucleic Acids. 2018 Jun 21;12:478–89. doi: 10.1016/j.omtn.2018.06.005 (PMC6070676; doi:10.1016/j.omtn.2018.06.005), 2018-06-21
Supplement: mmc1.pdf [file mmc1.pdf]

OMTN, Volume 12

## Supplemental Information

### Long-Term Morpholino Oligomers in Hexose Elicits Long-Lasting Therapeutic Improvements in *mdx* Mice

Gang Han, Caorui Lin, Hanhan Ning, Xianjun Gao, and HaiFang Yin

## Supplementary Figures

### Supplementary Figure 1

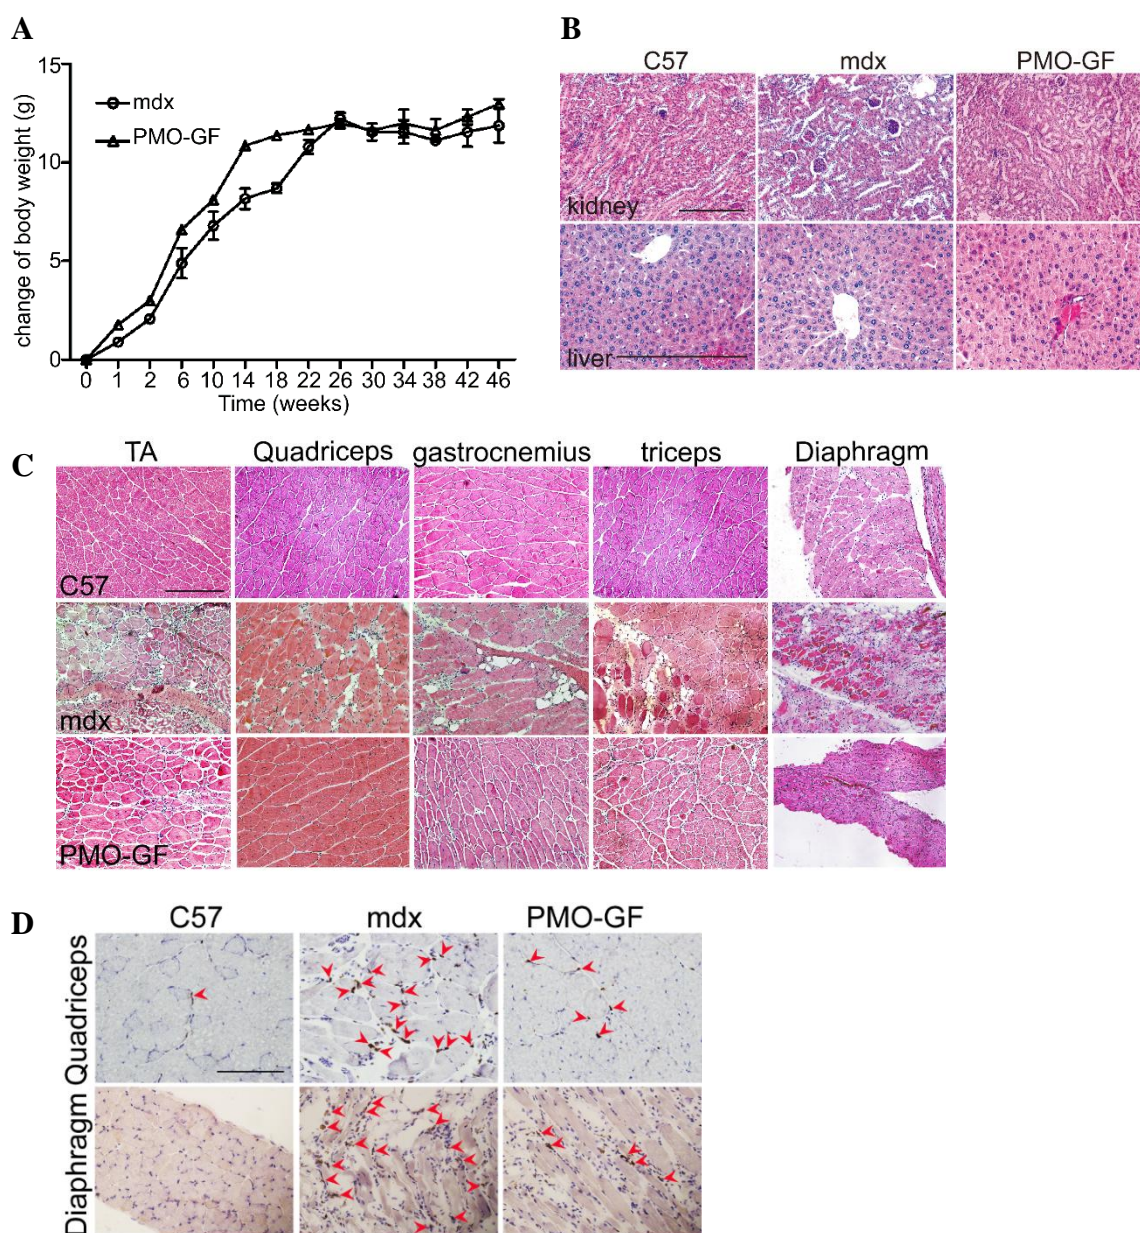

**Supplementary Figure 1. Examination of body-weight and pathophysiological changes of *mdx* mice treated with PMO-GF for one year. (A)** Measurement on body-weight of *mdx* mice treated with PMO-GF during the one-year time course. **(B)** H&E staining of kidney (upper panel) and liver (lower panel) tissues sections from *mdx* mice treated with PMO-GF, untreated *mdx* and *C57BL6* controls (scale bar = 200  $\mu$ m). **(C)** H&E staining of body-wide peripheral muscle tissue sections from *mdx* mice

treated with PMO-GF, untreated *mdx* and *C57BL6* controls (scale bar = 200  $\mu\text{m}$ ). (D) Detection of CD68<sup>+</sup> macrophage in the diaphragms and quadriceps of treated and untreated *mdx* mice (scale bar = 100  $\mu\text{m}$ ). Arrows indicate macrophages detected by CD68<sup>+</sup> mouse monoclonal antibody.

### Supplementary Figure 2

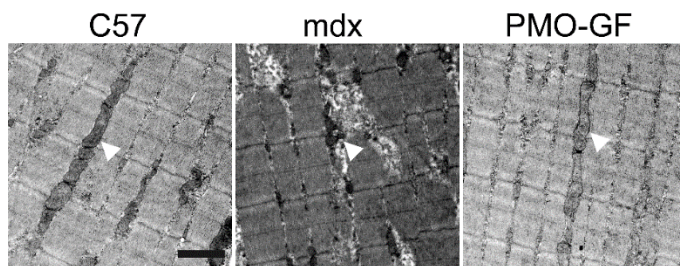

**Supplementary Figure 2. Transmission electron microscopy micrographs of the the intermyofibrillar mitochondria (IFM) pool density in *mdx* mice treated with PMO-GF for one year** (scale bar=2  $\mu\text{m}$ ). The arrowhead points to the IFM.

### Supplementary Figure 3

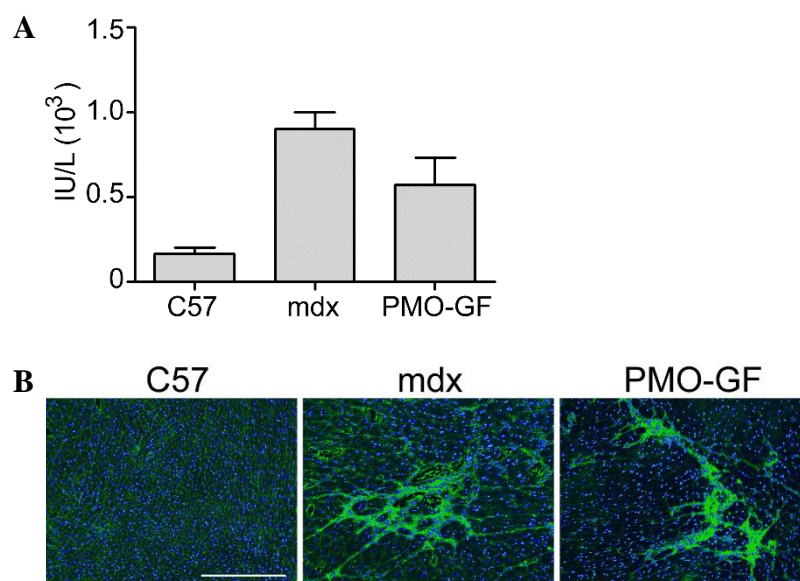

**Supplementary Figure 3.** Measurement of serum creatine kinase-MB (CK-MB) and membrane integrity in heart from *mdx* mice treated with PMO-GF for one year. **(A)** Measurement of serum creatine kinase-MB (CK-MB) levels. **(B)** IgG staining to assess the membrane integrity in heart from *mdx* mice treated with PMO-GF, untreated age-matched *mdx* and *C57BL6* controls (scale bar=200  $\mu$ m).
